# Supplementary material
Source: PubMed Central journal article supplement (PMC9204621)
Supplement: jamaophthalmol-e221946-s001.pdf [file jamaophthalmol-e221946-s001.pdf]

## Supplementary Online Content

Pardon LP, Macias BR, Ferguson CR, et al. Changes in optic nerve head and retinal morphology during spaceflight and acute fluid shift reversal. *JAMA Ophthalmol*. Published online June 16, 2022. doi:10.1001/jamaophthalmol.2022.1946

**eAppendix.** STROBE Reporting Guidelines: Additional Details and Exceptions

**eTable 1.** *P* Values for Change in Each Parameter During and After Spaceflight Relative to the Preflight Seated Value

**eTable 2.** Estimated Marginal Mean (95% CI) for Each Parameter Without and With Lower-Body Negative Pressure During Spaceflight

**eTable 3.** *P* Values for Change in Each Parameter With LBNP and Between-Flight Days Without LBNP

**eTable 4.** Estimated Marginal Mean (95% CI) for Each Parameter With Posture Changes Before and After Spaceflight

This supplementary material has been provided by the authors to give readers additional information about their work.

## **eAppendix. STROBE Reporting Guidelines: Additional Details and Exceptions**

This manuscript followed the STROBE Reporting Guidelines for a cohort study, with additional details and a few exceptions described below.

1. **Setting:** Dates, including periods of recruitment and data collection, are not included due to attributability concerns for astronaut and cosmonaut crewmembers.
2. **Study size:** A sample size calculation was performed for the larger Fluid Shifts study and determined that a minimum sample size of 10 crewmembers was required. Fourteen crewmembers were included to account for any missing data.
3. **Descriptive Data:** Missing data are described below:
  - a. One subject dropped out of the study after flight day (FD) 50 for reasons unrelated to the study
  - b. Lower body negative pressure (LBNP) data was not included for two subjects:
    - i. One subject did not participate in inflight LBNP due to development of a retinal hemorrhage
    - ii. One subject had scan quality issues on FD50 and scheduling constraints on FD150
  - c. Five Russian subjects were unable to return for imaging 10 days after return to Earth (R+10) due to travel constraints

All other items on the STROBE checklist are addressed in the main text of the manuscript.

**eTable 1.** *P* Values for Change in Each Parameter During and After Spaceflight Relative to the Preflight Seated Value

|                                              | <b>FD50<br/>vs.<br/>Preflight</b> | <b>FD150<br/>vs.<br/>Preflight</b> | <b>R+10<br/>vs.<br/>Preflight</b> | <b>R+30<br/>vs.<br/>Preflight</b> | <b>R+180<br/>vs.<br/>Preflight</b> |
|----------------------------------------------|-----------------------------------|------------------------------------|-----------------------------------|-----------------------------------|------------------------------------|
| <b>MRW (<math>\mu\text{m}</math>)</b>        | < .001                            | < .001                             | < .001                            | .007                              | .46                                |
| <b>Cup volume (<math>\text{mm}^3</math>)</b> | < .001                            | < .001                             | < .001                            | < .001                            | > .99                              |
| <b>BMO height (<math>\mu\text{m}</math>)</b> | .06                               | .009                               | .78                               | .97                               | .24                                |
| <b>TRT250 (<math>\mu\text{m}</math>)</b>     | < .001                            | < .001                             | < .001                            | .002                              | .36                                |
| <b>TRT500 (<math>\mu\text{m}</math>)</b>     | < .001                            | < .001                             | < .001                            | .002                              | .24                                |
| <b>TRT1000 (<math>\mu\text{m}</math>)</b>    | .72                               | .02                                | .27                               | .13                               | .02                                |
| <b>TRT1500 (<math>\mu\text{m}</math>)</b>    | .33                               | .77                                | .46                               | .96                               | .007                               |
| <b>MT500 (<math>\mu\text{m}</math>)</b>      | < .001                            | < .001                             | < .001                            | .003                              | .07                                |
| <b>MT1500 (<math>\mu\text{m}</math>)</b>     | < .001                            | < .001                             | < .001                            | .38                               | .13                                |
| <b>MT2500 (<math>\mu\text{m}</math>)</b>     | .11                               | .10                                | .06                               | .53                               | .41                                |

MRW, minimum rim width; BMO, Bruch’s membrane opening; TRT, total retinal thickness; TRT250, TRT from BMO to 250  $\mu\text{m}$ ; TRT500, TRT from 250 to 500  $\mu\text{m}$ ; TRT1000, TRT from 500 to 1000  $\mu\text{m}$ ; TRT1500, TRT from 1000 to 1500  $\mu\text{m}$ ; MT, macular thickness; MT500, MT from the fovea to 500  $\mu\text{m}$ ; MT1500, MT from 500 to 1500  $\mu\text{m}$ ; MT2500, MT from 1500 to 2500  $\mu\text{m}$ ; FD, flight day; R+, days after return to Earth.

The R+10 time point includes only 8 subjects, as several international crewmembers did not return directly to Houston

**eTable 2.** Estimated Marginal Mean (95% CI) for Each Parameter Without and With Lower-Body Negative Pressure During Spaceflight

|                                    | <b>FD50</b>                | <b>FD50 + LBNP</b>         | <b>FD150</b>               | <b>FD150 + LBNP</b>        |
|------------------------------------|----------------------------|----------------------------|----------------------------|----------------------------|
| <b>MRW (μm)</b>                    | 386.4<br>(349.2 – 423.5)   | 385.6<br>(348.3 – 422.8)   | 398.6<br>(361.4 – 435.8)   | 402.1<br>(364.9 – 439.3)   |
| <b>Cup volume (mm<sup>3</sup>)</b> | 0.167<br>(0.076 – 0.258)   | 0.168<br>(0.077 – 0.259)   | 0.158<br>(0.067 – 0.249)   | 0.155<br>(0.063 – 0.246)   |
| <b>BMO height (μm)</b>             | -124.7<br>(-156.3 – -93.0) | -125.0<br>(-156.7 – -93.3) | -127.2<br>(-158.8 – -95.6) | -122.2<br>(-153.9 – -90.6) |
| <b>TRT250 (μm)</b>                 | 413.0<br>(387.5 – 438.6)   | 412.9<br>(387.3 – 438.5)   | 424.4<br>(398.9 – 450.0)   | 427.3<br>(401.7 – 452.9)   |
| <b>TRT500 (μm)</b>                 | 381.7<br>(365.4 – 398.1)   | 381.0<br>(364.6 – 397.4)   | 387.6<br>(371.2 – 404.0)   | 388.6<br>(372.2 – 405.0)   |
| <b>TRT1000 (μm)</b>                | 339.9<br>(329.3 – 350.5)   | 339.6<br>(329.0 – 350.2)   | 341.5<br>(330.9 – 352.0)   | 341.9<br>(331.3 – 352.5)   |
| <b>TRT1500 (μm)</b>                | 303.2<br>(294.9 – 311.4)   | 303.2<br>(294.9 – 311.4)   | 302.7<br>(294.5 – 311.0)   | 303.4<br>(295.1 – 311.7)   |
| <b>MT500 (μm)</b>                  | 268.7<br>(258.6 – 278.7)   | 269.5<br>(259.4 – 279.6)   | 267.2<br>(257.1 – 277.2)   | 267.0<br>(256.9 – 277.1)   |
| <b>MT1500 (μm)</b>                 | 345.5<br>(336.6 – 354.4)   | 345.9<br>(336.9 – 354.8)   | 344.4<br>(335.5 – 353.4)   | 344.2<br>(335.3 – 353.2)   |
| <b>MT2500 (μm)</b>                 | 314.8<br>(307.1 – 322.4)   | 315.3<br>(307.6 – 322.9)   | 314.7<br>(307.1 – 322.4)   | 314.0<br>(306.3 – 321.7)   |

MRW, minimum rim width; BMO, Bruch’s membrane opening; TRT, total retinal thickness; TRT250, TRT from BMO to 250 μm; TRT500, TRT from 250 to 500 μm; TRT1000, TRT from 500 to 1000 μm; TRT1500, TRT from 1000 to 1500 μm; MT, macular thickness; MT500, MT from the fovea to 500 μm; MT1500, MT from 500 to 1500 μm; MT2500, MT from 1500 to 2500 μm; FD, flight day; LBNP, lower body negative pressure.

**eTable 3.** *P* Values for Change in Each Parameter With LBNP and Between-Flight Days Without LBNP

|                                              | <b>FD50<br/>vs.<br/>FD50 + LBNP</b> | <b>FD150<br/>vs.<br/>FD150 + LBNP</b> | <b>FD50<br/>vs.<br/>FD150</b> |
|----------------------------------------------|-------------------------------------|---------------------------------------|-------------------------------|
| <b>MRW (<math>\mu\text{m}</math>)</b>        | .76                                 | .20                                   | < .001                        |
| <b>Cup volume (<math>\text{mm}^3</math>)</b> | .85                                 | .06                                   | < .001                        |
| <b>BMO height (<math>\mu\text{m}</math>)</b> | .90                                 | .07                                   | .31                           |
| <b>TRT250 (<math>\mu\text{m}</math>)</b>     | .93                                 | .17                                   | < .001                        |
| <b>TRT500 (<math>\mu\text{m}</math>)</b>     | .63                                 | .28                                   | < .001                        |
| <b>TRT1000 (<math>\mu\text{m}</math>)</b>    | .63                                 | .43                                   | .04                           |
| <b>TRT1500 (<math>\mu\text{m}</math>)</b>    | .94                                 | .15                                   | .43                           |
| <b>MT500 (<math>\mu\text{m}</math>)</b>      | .30                                 | .84                                   | .046                          |
| <b>MT1500 (<math>\mu\text{m}</math>)</b>     | .54                                 | .76                                   | .06                           |
| <b>MT2500 (<math>\mu\text{m}</math>)</b>     | .32                                 | .18                                   | .99                           |

MRW, minimum rim width; BMO, Bruch's membrane opening; TRT, total retinal thickness; TRT250, TRT from BMO to 250  $\mu\text{m}$ ; TRT500, TRT from 250 to 500  $\mu\text{m}$ ; TRT1000, TRT from 500 to 1000  $\mu\text{m}$ ; TRT1500, TRT from 1000 to 1500  $\mu\text{m}$ ; MT, macular thickness; MT500, MT from the fovea to 500  $\mu\text{m}$ ; MT1500, MT from 500 to 1500  $\mu\text{m}$ ; MT2500, MT from 1500 to 2500  $\mu\text{m}$ ; FD, flight day; LBNP, lower body negative pressure.

**eTable 4.** Estimated Marginal Mean (95% CI) for Each Parameter With Posture Changes Before and After Spaceflight

|                                              | Preflight Seated           | Preflight Supine           | Preflight HDT              | R+10 Seated                | R+10 Supine                | R+10 HDT                   |
|----------------------------------------------|----------------------------|----------------------------|----------------------------|----------------------------|----------------------------|----------------------------|
| <b>MRW (<math>\mu\text{m}</math>)</b>        | 359.5<br>(330.3 – 388.6)   | 360.8<br>(331.6 – 389.9)   | 363.6<br>(334.4 – 392.7)   | 380.7<br>(351.4 – 410.0)   | 380.2<br>(351.0 – 409.5)   | 383.5<br>(354.2 – 412.7)   |
| <b>Cup volume (<math>\text{mm}^3</math>)</b> | 0.193<br>(0.102 – 0.284)   | 0.197<br>(0.106 – 0.288)   | 0.190<br>(0.099 – 0.281)   | 0.162<br>(0.071 – 0.253)   | 0.163<br>(0.072 – 0.255)   | 0.160<br>(0.069 – 0.251)   |
| <b>BMO height (<math>\mu\text{m}</math>)</b> | -118.3<br>(-146.7 – -89.8) | -122.7<br>(-151.2 – -94.3) | -121.2<br>(-149.7 – -92.8) | -114.0<br>(-142.6 – -85.3) | -115.9<br>(-144.5 – -87.3) | -112.9<br>(-141.5 – -84.2) |
| <b>TRT250 (<math>\mu\text{m}</math>)</b>     | 394.3<br>(375.9 – 412.7)   | 391.8<br>(373.4 – 410.1)   | 394.2<br>(375.8 – 412.6)   | 410.0<br>(391.5 – 428.5)   | 409.8<br>(391.3 – 428.3)   | 412.6<br>(394.2 – 431.1)   |
| <b>TRT500 (<math>\mu\text{m}</math>)</b>     | 370.9<br>(358.6 – 383.2)   | 370.2<br>(357.9 – 382.5)   | 370.9<br>(358.6 – 383.2)   | 381.1<br>(368.7 – 393.5)   | 379.9<br>(367.5 – 392.3)   | 381.2<br>(368.8 – 393.5)   |
| <b>TRT1000 (<math>\mu\text{m}</math>)</b>    | 337.6<br>(327.7 – 347.5)   | 337.1<br>(327.2 – 347.0)   | 336.9<br>(327.0 – 346.8)   | 340.5<br>(330.6 – 350.4)   | 340.2<br>(330.3 – 350.1)   | 339.5<br>(329.6 – 349.4)   |
| <b>TRT1500 (<math>\mu\text{m}</math>)</b>    | 302.5<br>(294.2 – 310.8)   | 302.1<br>(293.8 – 310.5)   | 301.7<br>(293.4 – 310.1)   | 302.4<br>(294.1 – 310.8)   | 302.4<br>(294.0 – 310.8)   | 302.3<br>(294.0 – 310.7)   |
| <b>MT500 (<math>\mu\text{m}</math>)</b>      | 272.4<br>(262.7 – 282.1)   | 272.0<br>(262.3 – 281.7)   | 271.1<br>(261.4 – 280.9)   | 267.6<br>(257.8 – 277.3)   | 266.7<br>(257.0 – 276.5)   | 265.9<br>(256.1 – 275.6)   |
| <b>MT1500 (<math>\mu\text{m}</math>)</b>     | 348.1<br>(339.3 – 356.9)   | 348.5<br>(339.7 – 357.3)   | 348.1<br>(339.3 – 356.9)   | 345.1<br>(336.3 – 353.9)   | 344.3<br>(335.5 – 353.1)   | 343.7<br>(334.9 – 352.6)   |
| <b>MT2500 (<math>\mu\text{m}</math>)</b>     | 315.7<br>(307.9 – 323.5)   | 316.3<br>(308.5 – 324.2)   | 316.0<br>(308.2 – 323.8)   | 314.7<br>(306.8 – 322.5)   | 314.3<br>(306.5 – 322.2)   | 313.6<br>(305.8 – 321.4)   |

MRW, minimum rim width; BMO, Bruch’s membrane opening; TRT, total retinal thickness; TRT250, TRT from BMO to 250  $\mu\text{m}$ ; TRT500, TRT from 250 to 500  $\mu\text{m}$ ; TRT1000, TRT from 500 to 1000  $\mu\text{m}$ ; TRT1500, TRT from 1000 to 1500  $\mu\text{m}$ ; MT, macular thickness; MT500, MT from the fovea to 500  $\mu\text{m}$ ; MT1500, MT from 500 to 1500  $\mu\text{m}$ ; MT2500, MT from 1500 to 2500  $\mu\text{m}$ ; HDT, head-down tilt; R+, days after return to Earth.

The R+10 time point includes only 8 subjects, as several international crewmembers did not return directly to Houston.
